5

## **Atypical Child-Parent Neural Synchrony Links to Children's Psychopathological Symptoms**

10

## Abstract

Family emotional climate is fundamental to child's emotional wellbeing and mental health. Negative family emotional climate may lead to heightened psychopathological symptoms via dysfunctional child-parent interactions. Single-brain paradigms have uncovered changes in brain systems and networks related to negative family environments, but how neurobiological reciprocity between child and parent brains is associated with children's psychopathological symptoms remains unknown. In study1, we investigated the relationship between family emotional climate and children's psychopathological symptoms in 395 child-parent dyads. In study2, using a naturalistic movie-watching functional magnetic imaging technique in a subsample of 100 children and parents, we investigate the neurobiological underpinnings of how family emotional climate is associated with children's psychopathological symptoms through child-parent neural synchrony. Children from negative family emotional climate experienced more severe psychopathological symptoms. We revealed significantly higher inter-subject correlations in the dorsal and ventral portions of the medial prefrontal cortex (mPFC), and greater concordance of activity with widespread brain regions critical for socioemotional skills in child-parent than child-stranger dyads. Critically, negative family emotional climate was associated with decreased inter-subject functional correlation between the ventral mPFC and the hippocampus in child-parent dyads, which further accounted for higher children's internalizing symptoms especially for anxious and depressed aspects. Family emotional climate might transmit into the brain of parent-child dyads, which may associate with child development outcomes. The present study identified that child-parent vmPFC-hippocampal circuitry is linked to children's psychopathological symptoms. Our findings suggest a neurobiological mechanism

of how negative family emotional climate affects children's psychopathological symptoms through altered child-parent neural synchrony.

35            *Keywords:* family emotional climate; children's psychopathological symptoms; child-parent neural synchrony; naturalistic fMRI paradigm

## Introduction

Family has been considered the primary socialization contexts for children, in which children begin to learn how to appropriately express and regulate their emotions through observing and modeling their parents' emotional behaviors (Eisenberg, 2020; McCoy & Raver, 2011). Family emotional climate, including family negative and positive emotion expression and specific emotion-related parenting, have great importance of shaping children's emotional wellbeing and mental health (Speidel et al., 2020). Research has indicated that family emotional climate, especially its negative aspect, can cause and maintain children's various psychopathological symptoms (Gong et al., 2021; Rea et al., 2020; Teicher et al., 2016).

Psychosocial views suggest that negative family emotional climate may lead to children psychopathology symptoms through derailing of the coordination of moment-to-moment behaviors between child-parent dyads (Feldman, 2020b; Morris et al., 2018). Indeed, previous studies have demonstrated that negative family environments compromise the effectiveness of reciprocal interactions in child-parent dyads (Hoyniak et al., 2021a; Tarullo et al., 2017). Children who experienced maladaptive family interaction with parents are prone to develop psychopathological symptoms later in life (Feldman, 2012) (Feldman, 2007; Quiñones-Camacho et al., 2021). According to bio-behavioral synchrony model, the coordination of children-parent interaction contains various components such as behavior, autonomic, hormones, and brain, which are closely associated with child developmental outcomes (Feldman, 2012). Although well documented in behavioral (e.g., Thomassin & Suveg, 2014) and physiological studies (e.g., Davis et al., 2018), the underlying neurobiological mechanisms of how family emotional climates

associate with child psychopathological symptoms via altered reciprocal responses across child-parent brains remain largely unknown.

60 With the concentration on cross-brain associations, the Extended Parent–Child Emotion Regulation Dynamics Model (Ratliff et al., 2022) proposed that parent-child brain-to-brain concordance is a key mechanism linking family system (e.g., family emotional climate) with child psychopathological symptoms. Guided by this framework, researchers have conducted studies to understand how indicators of family environment associated with parent-child brain-  
65 to-brain concordance (e.g., interbrain synchrony, shared neural similarity), and how the interbrain concordance is associated with children’s psychopathological symptoms. Using functional near-infrared spectroscopy hyperscanning techniques, recent studies have demonstrated neural synchrony in the prefrontal cortex (PFC) across brains critical for child-parent reciprocal interactions including cooperation (Reindl et al., 2018a) , joint attention and  
70 smiling (Piazza et al., 2020). Family risk factors including parenting stress (Azhari et al., 2019), maternal stress (Nguyen et al., 2020), anxious attachment (Azhari et al., 2020) , and sociodemographic risks (Hoyniak et al., 2021b) could diminish child-parent shared neural response in the PFC. Moreover, disrupted child-parent prefrontal synchrony was associated with children’s poor emotion regulation (Reindl et al., 2018a), heightened irritability (Quiñones-  
75 Camacho et al., 2020) , and salient autism spectrum disorder (ASD) symptoms among children with ASD (Wang et al., 2019). These findings provide initial evidence to suggest that family risk factors may alter child-parent brain-to-brain concordance, thus impeding children’s socioemotional ability in development.

In addition to examining brain-to-brain synchronization during parent-child interaction, the  
80 transmission of such shared representations may exhibit shared neural activity patterns between  
child and parent brains in response to any related events even without real-time interactions.  
Children learn social and emotional skills through dyadic interactions with their parents, which  
can help form and maintain shared neural representations of socioemotional experiences and  
knowledge in long-term memory and then contribute to their development (Feldman, 2007a;  
85 Fiske & Taylor, 2013). These processes require multiple brain regions and systems to interact  
and exchange information (Babiloni & Astolfi, 2014). Empirically, researchers have applied a  
sequential dual-brain fMRI paradigm (scans a single participant each time engaged in a shared  
task with two identical sessions to investigate the shared/different brain responses) to examine  
the psychological function of shared neural responses (Lee et al., 2017, 2018). Lee et al. (2018)  
90 indicated that mother-child dyads with lower levels of family connectedness showed less similar  
neural response patterns in anterior insular and dorsal anterior cingulate cortex (dACC), which  
then accounted for adolescent heightened perceived stress level during stress tasks. In addition,  
lower levels of resting state whole-brain connectome similarity were associated with children's  
poorer emotional competence, which might increase the risk of suffering psychopathological  
95 symptoms (Lee et al., 2017). However, existent studies about shared neural responses did not  
identify the role of PFC, especially the medial prefrontal cortex (mPFC), which cannot be  
examined via functional near-infrared spectroscopy and electroencephalogram due to the lack of  
space resolution and detecting deep brain regions.

The medial prefrontal cortex (mPFC), a core node of the social and emotional networks, is  
100 recognized to play a critical role in the transmission of shared socioemotional schema involving  
knowledge, values and beliefs across individuals (Krueger et al., 2009a; Roy et al., 2012a).

Indeed, recent studies demonstrate that the mPFC works in concert with the hippocampus allowing individuals to learn and accumulate necessary socioemotional knowledge and experience through social interactions (Hiser & Koenigs, 2018; Yeshurun et al., 2021).

105

Methodologically, mapping brain-to-brain concordance has the potential to advance our understanding on how shared socioemotional representations across brains arise from dyadic interactions between children and parents (e.g., Reindl et al., 2018). In particular, recent studies have utilized naturalistic movie watching fMRI to detect how individuals process and understand the complex socioemotional world based on our internal mental schema including long-term memory, emotion and prior belief. This paradigm lends itself to enabling inter-subject correlation (ISC) and inter-subject functional connectivity (ISFC) analyses to identify brain activity concordance in cortical and subcortical regions among subjects, and their related functional circuits during movie watching (Hasson et al., 2004a; Simony et al., 2016). Therefore, these approaches compute functional activity concordance across brains, and are emerging as a powerful tool for exploring brain function and their concordance across individuals that allows us to identify: 1) shared neural responses across child-parent brains during movie watching, 2) reactivity of related socioemotional knowledge in long-term memory in response to boundary and non-boundary events, 3) child-parent dyadic brain predictors underlying the effects of family emotional climate on children's psychopathological symptoms. Based on the Extended Parent-Child Emotion Regulation Dynamics Model (Ratliff et al., 2022), we hypothesized that child-parent dyads would exhibit increased brain-to-brain concordance in the mPFC and related functional circuits compared to control dyads (i.e., child-stranger dyads), and that amount of

110

115

120

concordance would mediate the association between negative family emotional climate and  
125 children's psychopathological symptoms.

To test the above hypotheses, we conducted two separate studies integrating behavioral  
assessments of family emotional climate and children's psychopathological symptoms, as well as  
dyad-based analysis of movie-watching fMRI data in child-parent and child-stranger dyads. In  
study 1, we investigated how family emotional climate related to children's psychopathological  
130 symptoms including internalizing and externalizing problems in 395 child-parent dyads (**Figure.  
1a**). We assessed family emotional climate using a well-validated scale that characterizes how  
often positive and negative emotions are expressed in a family (Halberstadt et al., 1995a) .  
Internalizing and externalizing symptoms were measured by the widely used child behavior  
checklist (CBCL) (Achenbach, 1991) . In study 2, we used a child-friendly naturalistic movie-  
135 watching paradigm in an fMRI experiment known for its ecological validity (Vanderwal et al.,  
2019) to measure child-parent shared brain responses in 50 child-parent dyads (**Fig. 1b**). Brain-  
to-brain concordance metrics in response to movie watching were assessed through ISC and  
ISFC methods. Given the correlational nature of dyad-based brain concordance, we used an  
optimized linear mixed effect model with crossed random effects to account for the complex data  
140 hierarchical structure(Chen et al., 2017) (**Figure. 1c**). Mediation analyses were used to examine  
if child-parent shared brain response accounts for the direct and/or indirect effects of negative  
family emotional climate on children's internalizing and externalizing symptoms.



## Methods and Materials

### 145 **Participants.**

A total of 446 families participated in Study 1. After removing participants with missing values (missing > 20%) in behavioral measures, data of 395 child-parent dyads (children: mean  $\pm$  S.D. = 9.35  $\pm$  1.64 years old, range 6.28-12.51, 50% boys; parents: mean  $\pm$  S.D. = 37.42  $\pm$  4.62 years old, range = 27-57, 33% father) were analyzed in the correlation between family emotional  
150 climate and child's psychopathological symptoms. All participants had normal or corrected-to-normal vision, and no one reported a history of psychiatric or neurobiological disorders. A subset of 50 child-parent dyads completed fMRI scanning while watching a negative movie clip in Study 2. Nine child-parent dyads were excluded due to children's head motion with mean framewise displacement larger than 0.5 mm during movie watching scanning. The final sample  
155 consists of 41 child-parent dyads (children: mean  $\pm$  S.D. = 10.15  $\pm$  1.41 years old, range 7-12, 46.3% boys; parents: mean  $\pm$  S.D. = 38.91  $\pm$  5.34 years old, range=29-49, 24.4% father). Six child-parent dyads were further excluded for the mediation analyses due to the incomplete family emotional expressiveness questionnaires. In the rest sample, after excluding subjects with mean framewise displacement larger than 0.5 mm, data of 25 pairs of children and parents were  
160 analyzed in the ISC and ISFC (children: mean  $\pm$  S.D. = 7.8  $\pm$  1.33 years old, range 7.80-12.26, 40% boys; parents: mean  $\pm$  S.D. = 39.31  $\pm$  5.51 years old, range=29 - 49, 16% father). All subjects provided written informed consent before their participation and received monetary compensation. The study was approved by the Institutional Review Board (IRB) of the local institute.

### 165 **Materials and Movie Watching**

A 6-minute video unfamiliar to all participants was shot for this study, which showed a 7-year-old girl arguing with her mother (**Figure. 1b**). Critical moments are provided in *Table S1*. Children and their parents underwent fMRI when separately viewing the video. This video was played with no sound/subtitles to mitigate potential confounds in auditory perception and language comprehension.

## **Psychological assessment**

### ***Psychopathological Symptoms***

Children's psychopathological symptoms were assessed by the parent-reported CBCL scores based on parent surveys (Achenbach, 1991) , including anxious/depressed syndrome withdrawn/depressed syndrome, somatic, score and rule-breaking, internalizing and externalizing score. The Chinese version of the CBCL has been used widely(Crijnen et al., 1999). The internal consistency of the parent-reported CBCL scales in the present study was  $\alpha = 0.81$  for internalizing problems and  $\alpha = 0.84$  for externalizing problems. The raw scores of all sub-scales were used in all analyses.

### ***Family Emotional Climate Assessment***

Family emotion climate was measured by the Family Expressiveness Questionnaire (EFQ) (Halberstadt et al., 1995b) . Parents reported how often positive and negative emotions were expressed in their family on a 9-point Likert scale. Coefficient alphas in the present sample were 0.89 and 0.85 for the positive and negative subscales.

### ***Family Socioeconomic Status Assessment***

Family socioeconomic status was measured by a self-report family background questionnaire that used 10- and 6-point scales to assess the education and monthly income of each parent respectively. To form a composite SES score for each parent, the income and

education scores were first divided into individual z scores for each parent, which were then  
190 averaged.

### **Brain Imaging Data Acquisition**

Whole-brain images were acquired from Siemens 3.0 T scanner (Siemens Magnetom  
Trio TIM, Erlangen, Germany), using a 12-channel head coil with a T2\*-sensitive echo-planar  
195 imaging (EPI) sequence based on blood oxygenation level-dependent (BOLD) contrast. Thirty-  
three axial slices (4 mm thickness, 0.6 mm skip) parallel to the anterior and posterior  
commissure (AC-PC) line and covering the whole brain. Each participant's high-resolution  
anatomical images were acquired through three-dimensional sagittal T1-weighted magnetization-  
prepared rapid gradient echo (MPRGE) with a total of 192 slices. Detail parameters and  
200 procedures are provided in supplementary information (SI).

### **Brain Imaging Data Analysis**

#### ***Preprocessing***

Based on previous studies on ISC pre-processing pipelines (Nastase et al., 2019), brain  
images were preprocessed using statistical parametric mapping (SPM12). Images were corrected  
205 for slice acquisition timing and realigned for head motion correction. Subsequently, functional  
images were co-registered to each participant's gray matter image segmented from  
corresponding T1-weighted image, then spatially normalized into a common stereotactic MNI  
space and resampled into 2-mm isotropic voxels. Images were smoothed by an isotropic 3D  
gaussian kernel with 6-mm full-width half-maximum (FWHM). The preprocessed images were  
210 regressed on a set of nuisance covariates (i.e., motion parameters, the average signal of white  
matter and cerebrospinal fluid) and 140-sec high-pass filtered using toolbox Nilearn version

0.6.2. Finally, the first 5 volumes and the last 5 ones were removed to minimize stimulus onset and offset effects and the data were z-scored overtime.

### ***Inter-Subject Correlation (ISC) and Statistical Analysis***

215 Whole-brain ISC maps during movie watching were computed for all possible pairs of 41 participants in a gray-matter mask using BrainIAK's ISC function (Kumar et al., 2020) (Figure. 1b). The ISC maps were submitted to further statistical analyses to identify brain regions that show synchronous (shared) neural response across the whole sample. We adopted a linear mixed-effects (LME) model using a crossed random-effects formulation which can accurately  
220 interpret the ISC data's correlation structure (Chen et al., 2017). Participants' gender, age, and scanning sites were treated as covariates of no interest in the LME model. False discovery rate (FDR) correction was used to correct multiple comparisons (Benjamini & Hochberg, 1995). Next, we used a two-group formulation of the LME model with three covariates (age, gender, and site) to identify whether there were voxels that were more synchronous in child-parent dyads than  
225 child-stranger pairs. Child-parent dyads were defined by pairing a child and their own parent, and child-stranger dyads were generated by pairing a child with all parents except their own parent. 3dClustSim module of AFNI was used to correct multiple comparisons, with a voxel-wise  $p < 0.001$ , cluster-wise  $\alpha < 0.05$ .

### ***Inter-Subject Functional Connectivity (ISFC) Analysis.***

230 ISFC analysis was implemented to identify movie-evoked functional connectivity across participants. We used a seed-based ISFC approach by computing the correlation of a given seed's [i.e., 6-mm sphere of the peak voxel at MNI coordinate (2, 38, -18) in the vmPFC and (0,56,12) in the dmPFC] time series in one participant with every other voxel's time series in another participant. The computation of ISFC produced two asymmetric matrices for

235  $r_{(VMPFC_{subject1}, Y_{subject2})}$  and  $r_{(VMPFC_{subject2}, Y_{subject1})}$ . We then computed the average correlation, which  
was treated as the ISFC value between each participant pair where  $r$  represents Pearson's  
correlation and  $Y$  represents the time series of each given voxel from participants. Likewise, the  
LME was used to determine which brain regions showed higher coordination with vmPFC and  
dmPFC in child-parent pairs than child-stranger pairs. False discovery rate (FDR) was used to  
240 correct multiple comparisons <sup>42</sup>.

### ***Intra-Subjective Functional Connectivity (FC) Analysis.***

To verify that child-parent vmPFC-hippocampal ISFC played a unique role in the  
relationship between negative family emotional climate and children's internalizing problem, we  
also examined whether the single brain's vmPFC-seed FC is associated with negative family  
245 emotional climate and children's internalizing problem. We examined single brain FC in  
children's and parent's brains, and ran multiple regressions with negative family emotional  
climate and children's internalizing problems, as separate regressors, predicting vmPFC-seed  
function connectivity. Other settings are identical for above ISFC.

### ***Meta-Analytic Decoding with Neurosynth.***

250 The neurosynth allows us infer the psychological domains involved in brain map of the  
shared vmPFC-circuits in child-parent dyads. Specifically, we correlated the child-parent  
thresholded vmPFC and dmPFC ISFC map (FDR  $q < 0.05$ ) to the topics map of 15 general  
psychological domains involving a range of possible brain processes during movie viewing using  
the Neurosynth's python notebook ( [<https://github.com/neurosynth/neurosynth>]; commit  
255 version 948ce7).

### ***Mediation Analysis.***

Mediation analysis was performed using the Mediation Toolbox developed by Tor Wager's group (<https://github.com/canlab/MediationToolbox>). Prior to the mediation analysis, average values representing intersubject functional connectivity strength with vmPFC and dmPFC were extracted from 13 significant clusters and 2 significant clusters identified in the above linear mixed model to examine the correlation with negative family emotional climate using FDR corrections (67) to control the false-positives. Next, a mediation model was constructed to investigate the mediating pathways between negative family emotional climate, shared vmPFC-hippocampus ISFC strength, and children's anxious/depressed and internalizing problems. The indirect or mediated effect was tested by a bias-corrected bootstrapping method (n = 10000 resamples). All statistical tests here are two-tailed and pass the FDR correction. More details are provided in SI.

### ***Event Boundary Analysis.***

The correlation between hippocampal, vmPFC responses and event rating. Event boundaries were collected by an independent group of 20 adult raters (10 males) who watched this 6-minute silent video. The rates were asked to press a key at the end of one meaningful event and the beginning of another. In line with Reagh's studies (68), we include the boundary timepoints and non-boundary timepoints of this video. Boundaries timepoints are agreed by at least half of the samples, and we find a total of 10 event boundaries of the time series. We also add the same number of non-boundary time points compared to the event boundaries. The boundary and non-boundary time points were next convolved with a canonical HRF to obtain the boundary and non-boundary timeseries. Then we correlated each participant's hippocampal and vmPFC timeseries with the event boundary and non-boundary timeseries derived from the independent raters. Finally, we examined whether children's hippocampal and vmPFC response

280 to boundary and non-boundary timeseries were correlated with their parents'. All statistical tests here are single-tailed and pass the FDR correction.

## Results

### Negative Family Emotional Climate Linked to Children's Internalizing/Externalizing

#### 285 Symptoms

First, we examined how family emotional climate, including positive and negative components was associated with children's internalizing and externalizing symptoms in Study 1. Pearson's correlation analyses revealed that negative family emotional climate was associated with more severe children's internalizing symptoms ( $r_{395} = 0.17$ ,  $q < 0.001$ , 95% CI = [0.08, 0.26]), including anxious/depressed ( $r_{395} = 0.13$ ,  $q = 0.024$ , 95% CI = [0.03, 0.22]), withdrawn/depressed ( $r_{395} = 0.16$ ,  $q = 0.005$ , 95% CI = [0.07, 0.25]), and somatic problems ( $r_{395} = 0.13$ ,  $q < 0.001$ , 95% CI = [0.04, 0.22]), as well as externalizing symptoms ( $r_{395} = 0.23$ ,  $q < 0.001$ , 95% CI = [0.14, 0.32]), including aggressive ( $r_{395} = 0.24$ ,  $q < 0.001$ , 95% CI = [0.07, 0.24]) and rule-breaking behaviors ( $r_{395} = 0.15$ ,  $q = 0.001$ , 95% CI = [0.14, 0.32]) (*all q values were FDR corrected*) (**Figure. 1a**). There were no reliable associations of positive family emotional climate and children's internalizing and externalizing symptoms (all  $r_{S395} < 0.01$ ,  $q_s > 0.70$ ). Further tests for Fisher's z-transformed correlation coefficients revealed statistically stronger correlations with negative than positive family emotional climate (all  $Z_s > 1.95$ ,  $q_s < 0.05$ , FDR corrected). Notably, the positive associations of negative family emotional climate with children's internalizing and externalizing symptoms remained statistically significant after controlling for child's and parent's age, gender, and socioeconomic status (*Supplementary Figure. S1*). These results indicate that children from negative family environment exhibit more severe internalizing and externalizing symptoms.

#### 305 Increased Inter-Subject Correlation in Vmpfc and Dmpfc during Movie Watching for Child-Parent Dyads



Next, we identified shared patterns of temporal neural activity in response to viewing a negative movie across brains. The ISC maps were computed to represent shared brain activity by correlating time series of the same voxel across participants (**Figure. 2a**). A linear mixed-effects (LME) model was conducted for ISC maps collapsing across children and parents to identify  
310 brain regions showing inter-subject synchrony during movie watching. This analysis revealed significant clusters in unimodal and transmodal association areas (**Figure. 2b**,  $q < 0.05$  FDR-corrected). This pattern of results is consistent with ISC data from previous fMRI studies (Finn et al., 2018; Hasson et al., 2004b).

We conducted dyad-based analysis using ISC maps between each child and their parent  
315 in comparison to each child and a stranger's parent as a control. We implemented an optimized LME model with crossed random effects (Chen et al., 2017), and examined brain systems showing shared temporal neural responses during movie watching that unique to child-parent dyads relative to child-stranger controls. This analysis (**Figure. 2c**, *Supplementary Table S3*) revealed significant clusters (voxel-wise  $p < 0.001$  two-tailed, cluster-wise significance level  $\alpha <$   
320  $0.05$ ) in the vmPFC [peak MNI coordinate at (2,38, -18); cluster size  $k = 116$  voxels] and the dorsal mPFC (dmPFC) [peak at (0, 52, 12),  $k = 122$  voxels]. There were no surviving significant clusters when examining greater activity in child-stranger versus child-parent dyads. To verify whether this effect is specific to movie stimulus, we also performed parallel analysis for resting state fMRI data, and there were no statistically reliable ISC effects in the vmPFC and dmPFC.

### 325 **Increased Child-Parent Vmpfc Connectivity with Social and Emotional Systems during Movie Watching**

Given that mPFC-centric circuitry is implicated in human emotion and social cognition (Krueger et al., 2009b; Lieberman et al., 2019), we used the vmPFC and dmPFC clusters

identified above as separate seeds to perform inter-subject functional connectivity analyses. The  
330 LME model for vmPFC-seeded ISFC map was examined to identify functional circuits showing  
higher inter-subject connectivity in child-parent versus child-stranger dyads (Figure. 3a). This  
analysis revealed statistically significant clusters in widespread regions in the frontal, temporal  
and occipital lobes, including the hippocampus [peak MNI coordinates (-16, -30, -8)], amygdala  
[peak MNI coordinates (18,2, -16)], and fusiform gyrus [peak MNI coordinates (-32, -48, -8)],  
335 FDR  $q < 0.05$  (**Figure. 3b-d**, Supplementary Table S4). Parallel analysis for dmPFC-seeded  
ISFC maps revealed that child-parent dyads exhibited higher connectivity with the angular gyrus  
[peak MNI coordinates (-46, -64, 24)] and medial prefrontal gyrus [peak MNI coordinates  
(0,54,14)] (Supplementary Figure. S2a, Table S4) than child-stranger dyads, FDR  $q < 0.05$ . To  
verify whether this effect is specific to movie watching, we also performed parallel analysis for  
340 resting-state fMRI data, and there were no any reliable ISFC effects in child-parent dyads  
compared to child-stranger controls.

We then used a meta-analytic decoding approach based on a widely used Neurosynth  
platform (Yarkoni et al., 2011) to determine psychological functions of the above clusters that  
showed higher inter-subject connectivity with the vmPFC and dmPFC in child-parent than child-  
345 stranger dyads. This analysis revealed that child-parent shared vmPFC-based connectivity  
patterns with widespread regions that are implicated in episodic memory, emotion, and social  
functions (**Figure. 3c**), whereas dmPFC-based connectivity did not exhibit a connectivity pattern  
implicated in these functions (Supplementary Figure. S2c). These results indicate higher vmPFC  
connectivity with social and emotional systems in child-parent dyads than child-stranger controls.

## 350 **Reduced Child-Parent Vmpfc Connectivity with the Hippocampus Mediates the Association between Negative Family Emotional Climate and Children'S Internalizing Symptoms**

Given our central hypothesis that neural mechanisms link negative family emotional climate and psychopathological symptoms, we further investigated how negative family emotional climate shapes inter-subject correlation of brain activity and connectivity during 355 movie watching in child-parent dyads, which was then associates with children's psychopathological symptoms. Brain-behavior association analyses were conducted for ISC and ISFC metrics of the vmPFC and dmPFC. With these metrics, we found that family emotional climate was significantly correlated with lower child-parent shared vmPFC connectivity with the 360 left hippocampus (**Figure. 4b**) and right precuneus ( $q = 0.03$ , FDR corrected; *Supplementary Table S4*). Next, we observed a negative correlation of child-parent vmPFC-hippocampal functional connectivity with children's internalizing symptoms, especially for anxious/depressed components ( $q = 0.06$ , FDR correction).

Since child-parent vmPFC-hippocampal connectivity was associated with both negative 365 family emotional climate and children's internalizing symptoms, we conducted a mediation analysis to examine whether this inter-subject functional pathway accounts for the association between negative family emotional climate and children's internalizing problems. This analysis revealed an indirect pathway of reduced vmPFC connectivity with the hippocampus mediating the association between negative family emotional climate and higher children's internalizing 370 symptoms (**Figure. 4c**,  $B = 0.17$ ,  $SE = 0.10$ ,  $p = 0.028$ , bootstrapped 95% CI = [0.01,0.42], 56.7% of the total effect size) and children's anxious/depressed symptoms ( $B = 0.19$ ,  $SE = 0.12$ ,  $p = 0.04$ , bootstrapped 95% CI = [0.00,0.46], 59.4% of the total effect size). Notably, the

mediation effect was significant even when regressing out child-parent's age and gender (*Supplementary Figure. S4b*). Since children's emotional problems could influence family emotional climate (Rothenberg et al., 2020), we tested an alternative model with children's internalizing symptoms as input variable and negative family emotional climate as a outcome predictor. Although this model is also valid (*Supplementary Figure. S4c&d*), model comparison with Bayesian Information Criterion (BIC) favors the initial model with family emotional climate affecting child internalizing symptoms (BIC = 113.89) over the reverse alternative model (BIC = 228.34)(Raftery, 1995).

To verify whether negative family emotional climate is associated with children's internalizing problem through shared rather than individual vmPFC-hippocampus responses, we performed vmPFC-seeded functional connectivity within children's brains (**Figure. 4a**). We did not find any reliable effects pertaining to intra-brain metrics (**Figure. 4b**). In addition, we conducted time-lagged analysis for vmPFC-based ISFC to determine when child-parent dyads exhibited the highest ISFC. This analysis revealed that child-parent dyads exhibited highest vmPFC-hippocampal functional correlation at lag zero (*Supplementary Figure. S3*). Together, these results indicate that reduced child-parent vmPFC connectivity with the hippocampus accounts for the adverse effects of negative family emotional climate on children's internalizing symptoms.

### **Child-Parent Vmpfc and Hippocampal Activity Concordance in Event Boundaries during Movie Watching**

According to recent neurocognitive models of event segregation, the hippocampus and vmPFC are recognized to support segregation of event boundaries and integration of episodic events into structured representations (Baldassano et al., 2017; Ben-Yakov & Henson, 2018;

Ezzyat & Davachi, 2021). Our perception and process of such events are actively shaped by existing memories and schematic scripts about experiences in the world (Baldassano et al., 2018). Living in the same family environment, child-parent dyads often have reciprocal interactions during various social and emotional scenarios, and thus they tend to form shared mental schemas on how to understand, cope and respond to key events. Thus, we expected that children would exhibit a similar pattern of hippocampal responses to the moments of shift between meaningful events (boundary timepoints) with their parents.

We therefore implemented dyad-based analysis of brain responses to event segmentation during movie watching to examine whether children's hippocampal and vmPFC responses to event boundary and non-boundary timepoints are correlated with their parents. As expected, this analysis revealed that children's hippocampal responses to event boundaries were indeed positively associated with their parent's responses ( $r = 0.27$ ,  $p = 0.04$ , 95% CI = [0.04, 0.48]). This concordance, however, did not emerge for within-event time points ( $r = -0.13$ ,  $p = 0.21$ , 95% CI = [-0.32, 0.26]). Further Z-test analysis for two correlations coefficients reveals a significant difference ( $Z = 1.84$ ,  $p = 0.03$ ). Interestingly, parallel analysis revealed an opposite pattern of child-parent concordance for the vmPFC activity. That is, children's vmPFC responses to non-boundary timepoints were positively correlated with their parents ( $r = 0.33$ ,  $p = 0.02$ , 95% CI = [0.03, 0.54]), but not for event boundaries ( $r = 0.03$ ,  $p = 0.42$ , 95% CI = [-0.22, 0.30]). Further tests revealed a marginally significant difference between the two correlations ( $Z = -1.39$ ,  $p = 0.08$ ). Taken together, these results indicate that the vmPFC and hippocampus exhibit interactive activity concordance in child-parent dyads in response to non-boundary and boundary events during movie watching.

## Discussion

420 By leveraging dyad-based analysis of fMRI data during naturalistic movie watching, we investigated the neural substrates of how negative family emotional climate was associated with children's psychopathological symptoms through child-parent brain-to-brain activity and connectivity concordance. Compared to child-stranger dyads, child-parent dyads exhibited higher inter-subject correlation in the vmPFC and dmPFC, and higher inter-subject connectivity  
425 of the vmPFC with widespread regions critical for socioemotional cognition. Critically, reduced child-parent vmPFC-hippocampal connectivity accounted for the association between negative family emotional climate and children's internalizing symptoms, with distinct contributions of the vmPFC and hippocampus to non-boundary and boundary events, respectively, during movie watching. Our findings provide a neurobehavioral model of how negative family emotional  
430 climate is associated with children's internalizing symptoms through reduced child-parent brain-to-brain concordance in the vmPFC-hippocampal circuitry.

Behaviorally, children in negative family emotional climate experienced more severe psychopathological symptoms as indicated by heightened internalizing and externalizing problems. This is in line with previous findings showing positive associations between family  
435 risk factors (e.g., maternal maltreatment, family conflicts) and children's internalizing and externalizing symptoms (Gong et al., 2021; Schleider & Weisz, 2017) . According to social learning and bio-behavioral synchrony models (Feldman, 2020a; Justyna, 2017) , child-parent shared experiences are indispensable for children to learn and develop emotional skills through socialization from their parents in daily life. Through child-parent reciprocal interactions such as  
440 affective synchrony and empathic dialogues, for instance, children regulate themselves to attune to each other's minds, which helps them develop socioemotional skills such as emotion

regulation and theory of mind and then reduce the risk of suffering psychopathological symptoms (Feldman, 2020; Thomassin & Suveg, 2014]).

Socioemotional interactions in a family have also been demonstrated to help child-parent  
445 dyads build a shared or synchronous pattern of brain responses (Piazza et al., 2020; Wass et al., 2020). Such shared neural responses can serve as a scaffold for children's socialization helping children learn necessary skills and form memories through reciprocal interactions with their parents in daily life (Reindl et al., 2018b). Thus, negative family environment (e.g., negative family emotional climate) may impede child-parent brains from forming effective  
450 socioemotional skills, accounting for the emergence of children's psychopathological symptoms. As discussed below, this account is supported by three aspects of our observed concordance across child-parent brains.

Our movie-watching fMRI results show that children-parent dyads exhibited higher inter-subject correlation in the vmPFC and dmPFC than control child-stranger dyads. This is  
455 reminiscent of previous findings showing that the mPFC plays a critical role in characterizing shared neurocognitive processes between children and their parents (Hoyniak et al., 2021a; Itahashi et al., 2020; Piazza et al., 2020). The mPFC is thought to act as a simulator for social event schemas that allows us to integrate and summarize social, self and emotional information as events unfold over time (Krueger et al., 2009a). When processing socioemotional events, the  
460 dmPFC is important for inferring other's goal-oriented actions, whereas the vmPFC is crucial for appraisal, evaluation and regulation of values involved in self and affective processes (Bzdok et al., 2013). Such processes could serve as a neurocognitive basis to understand the intentions and mental states of others (Fiske & Taylor, 2013). Thus, higher inter-subject correlation in the

dmPFC and vmPFC across child-parent dyads likely reflect similarities in how child-parent  
465 dyads perceive and react emotionally to the socioemotional world.

Our results also show that child-parent dyads exhibited higher inter-subject correlation of  
vmPFC- and dmPFC-based functional connectivity with widespread regions of social and  
emotional brain networks in comparison with child-stranger dyads. Specifically, child-parent  
dyads shared vmPFC coupling with distributed regions crucial for episodic memory, emotion  
470 and social processing (Lieberman et al., 2019; Phillips et al., 2019) , while shared dmPFC  
coupling had relatively uniform connectivity with regions such as TPJ during movie watching.  
These inferences were drawn from a widely used reverse inference database (Yarkoni et al.,  
2011). The vmPFC and its coordination with the hippocampus, precuneus, amygdala and among  
others are recognized to support the appraisal of perceived socioemotional events (Hiser &  
475 Koenigs, 2018) and the reinstatement of existing knowledge and strategies formed over the  
course of child-parent interactions (Feldman, 2015, 2017) . These processes help children learn  
how to cope with negative emotions(Nawa & Ando, 2019; Roy et al., 2012b). Our data suggest  
that vmPFC circuitry is critical for integration of disparate events shared by child-parent dyads  
when viewing emotionally negative movies, likely by promoting transmission of affectivity and  
480 sociality across child-parent dyads.

Furthermore, our fMRI results additionally showed that reduced brain-to-brain  
concordance as indicated in the vmPFC-hippocampal pathway in child-parent dyads mediated  
the association between negative family emotional climate and more severe child internalizing  
symptoms, highlighting a possible mechanism for how negative family emotional climate  
485 associates with children's psychopathological symptoms. This finding provided one of the first



empirical evidence of the Extended Parent–Child Emotion Regulation Dynamics Model (Ratliff et al., 2022), supporting that cross-brain connectivity between child and parent serves as an important mechanism linking family environment with child emotional development, and the vmPFC-hippocampal circuitry is important for constructing the meaning of emotional events (Nawa & Ando, 2019; Roy et al., 2012b) . Child-parent concordance of vmPFC-hippocampal coupling during movie-watching likely reflects their co-construction of socioemotional events according to shared and/or embodied relationships. Constructing the meaning of emotional events can be a useful way to regulate children's internalizing states to achieve psychological balance (Carpendale & Lewis, 2004) . It is possible that children with higher parental concordance of vmPFC-hippocampal connectivity may develop better socioemotional skills and thus exhibit lower levels of internalizing symptoms. Our observed mediation effect suggests that child-parent vmPFC-hippocampal concordance could serve as a potential biomarker for children in families with emotional disorders. Future work may use neurofeedback techniques to explore the impact of upregulating vmPFC-hippocampus coordination with parents on children's emotional health.

VmPFC-hippocampal circuitry is also crucial in updating and integrating new events into existing memory schemas(Gilboa & Marlatt, 2017; Zeithamova et al., 2012). Increased vmPFC-hippocampal concordance may reflect child-parent dyads with lower negative family emotional climate by updating their internal schemas when socioemotional events are incongruent with existing schemas. Although we cannot rule out this possibility, analysis of event boundary-evoked response revealed that children's hippocampal responses to event boundaries were positively related to their parent's responses. Given that segmenting continuous events into meaning units is driven by our experience and mental schemas(Baldassano et al., 2018), child-

parent hippocampal activity concordance on boundary-evoked response suggests that child-  
510 parent dyads utilize their shared episodic memories and schemas to understand and interpret  
socioemotional events during movie watching. Together with stronger inter-subject vmPFC-  
hippocampal connectivity observed in child-parent dyads, our results are among the first to  
suggest that the vmPFC may signal child-parent hippocampal activity concordance in order to  
orchestrate long-term memory, emotional and social systems in support of their understanding of  
515 events during movie watching.

Several limitations should be considered in our study. First, we assessed child-parent  
neural concordance at activity and connectivity levels when viewing emotionally negative  
movies. Whether our findings can be generalized into positively valenced situations still remains  
open for future studies. Second, although we leveraged a naturalistic movie-watching fMRI  
520 paradigm, dedicated task designs are needed to complement the interpretation of child-parent  
shared neural responses in vmPFC and related circuits. Finally, it is worth noting that we also  
observed the indirect effect of child-parent shared brain responses in the association of negative  
family emotional climate with children's internalizing problems. It is thus possible that such  
relationships are bidirectional (Gong et al., 2021; Nelemans et al., 2020). Longitudinal designs  
525 are required to disentangle the directionality effects.

### **Conclusion**

The present study demonstrates brain-to-brain concordance across child-parent dyads  
during movie watching that was localized to the mPFC and its connectivity with regions in  
socioemotional networks. Inter-brain concordance in ventral mPFC-hippocampal circuitry, rather  
530 than intra-brain metrics, emerged as a key locus that mediates the adverse effect of negative  
family environment on children's internalizing symptoms. Our study provides a neurobiological

account for how negative family environment influences children's internalizing symptoms through shared socioemotional representations across brains in child-parent dyads. This work can inform the development of dyad-based prevention and interventions designed to improve  
535 children's internalizing problem.

## Acknowledgments

### Author contributions:

S.Q. and Z.R.H. conceptualized this project. H.S. collected data. J.W. contributed to  
540 cleaning data. H.S. and G.C. performed data analyses. H.S., C.B.Y., Z.R.H., J.X. and S.Q. wrote  
the manuscript.

### Competing Interests

The authors declare that they have no competing interests.

### Data and Materials Availability

545 All data needed to evaluate the conclusions er are present in the paper and/or the  
Supplementary Materials. Raw data may be requested from the corresponding authors.

## References

- 55 Achenbach, T. M. (1991). Manual for the Child Behavior Checklist/4-18 and 1991 profile. *University of Vermont, Department of Psychiatry*.
- Azhari, A., Gabrieli, G., Bizzego, A., Bornstein, M. H., & Esposito, G. (2020). *Maternal Anxious Attachment Style is Associated with Reduced Mother- Child Brain-to-Brain Synchrony During Passive TV Viewing*. <https://doi.org/10.1101/2020.01.23.917641>
- 55 Azhari, A., Leck, W. Q., Gabrieli, G., Bizzego, A., Rigo, P., Setoh, P., Bornstein, M. H., & Esposito, G. (2019). Parenting Stress Undermines Mother-Child Brain-to-Brain Synchrony: A Hyperscanning Study. *Scientific Reports*, 9(1), 11407. <https://doi.org/10.1038/s41598-019-47810-4>
- Babiloni, F., & Astolfi, L. (2014). Social neuroscience and hyperscanning techniques: Past, present  
560 and future. *Neuroscience and Biobehavioral Reviews*, 44, 76–93.  
<https://doi.org/10.1016/j.neubiorev.2012.07.006>
- Baldassano, C., Chen, J., Zadbood, A., Pillow, J. W., Hasson, U., & Norman, K. A. (2017). Discovering Event Structure in Continuous Narrative Perception and Memory. *Neuron*, 95(3), 709-721.e5. <https://doi.org/10.1016/j.neuron.2017.06.041>
- 56 Baldassano, C., Hasson, U., & Norman, K. A. (2018). Representation of Real-World Event Schemas during Narrative Perception. *Journal of Neuroscience*, 38(45), 9689–9699.  
<https://doi.org/10.1523/JNEUROSCI.0251-18.2018>
- Benjamini, Y., & Hochberg, Y. (1995). Controlling the False Discovery Rate: A Practical and Powerful Approach to Multiple Testing. *Journal of the Royal Statistical Society: Series B (Methodological)*, 57(1), 289–300. <https://doi.org/10.1111/j.2517-6161.1995.tb02031.x>  
570

- Ben-Yakov, A., & Henson, R. N. (2018). The hippocampal film editor: Sensitivity and specificity to event boundaries in continuous experience. *Journal of Neuroscience*, *38*(47), 10057–10068. <https://doi.org/10.1523/JNEUROSCI.0524-18.2018>
- Bzdok, D., Langner, R., Schilbach, L., Engemann, D. A., Laird, A. R., Fox, P. T., & Eickhoff, S. B. (2013). Segregation of the human medial prefrontal cortex in social cognition. *Frontiers in Human Neuroscience*, *7*, 1–17. <https://doi.org/10.3389/fnhum.2013.00232>
- Carpendale, J. I. M., & Lewis, C. (2004). Constructing an understanding of mind: The development of children's social understanding within social interaction. *Behavioral and Brain Sciences*, *27*(1), 79–96.
- 58 Chen, G., Taylor, P. A., Shin, Y. W., Reynolds, R. C., & Cox, R. W. (2017). Untangling the relatedness among correlations, Part II: Inter-subject correlation group analysis through linear mixed-effects modeling. *Neuroimage*, *147*, 825–840. <https://doi.org/10.1016/j.neuroimage.2016.08.029>
- Crijnen, A. A. M., Achenbach, T. M., & Verhulst, F. C. (1999). Problems reported by parents of 585 children in multiple cultures: the Child Behavior Checklist syndrome constructs. *American Journal of Psychiatry*, *156*(4), 569–574.
- Eisenberg, N. (2020). Findings, issues, and new directions for research on emotion socialization. *Developmental Psychology*, *56*(3), 664–670. <https://doi.org/10.1037/DEV0000906>
- Ezzyat, Y., & Davachi, L. (2021). Neural evidence for representational persistence within events. 590 *Journal of Neuroscience*, *41*(37), 7909–7920. <https://doi.org/10.1523/JNEUROSCI.0073-21.2021>

- Feldman, R. (2007). Parent-infant synchrony and the construction of shared timing; physiological precursors, developmental outcomes, and risk conditions. *Journal of Child Psychology and Psychiatry*, 48(3–4), 329–354. <https://doi.org/10.1111/j.1469-7610.2006.01701.x>
- 59 Feldman, R. (2012). Bio-behavioral Synchrony: A Model for Integrating Biological and Microsocial Behavioral Processes in the Study of Parenting. *Parenting*, 12(2–3), 154–164. <https://doi.org/10.1080/15295192.2012.683342>
- Feldman, R. (2015). The adaptive human parental brain: implications for children’s social development. *Trends in Neurosciences*, 38(6), 387–399. <https://doi.org/10.1016/j.tins.2015.04.004>
- 600 Feldman, R. (2017). The Neurobiology of Human Attachments. *Trends in Cognitive Sciences*, 21(2), 80–99. <https://doi.org/10.1016/j.tics.2016.11.007>
- Feldman, R. (2020a). What is resilience: an affiliative neuroscience approach. *World Psychiatry*, 19(2), 132–150. <https://doi.org/10.1002/wps.20729>
- 60 Feldman, R. (2020b). What is resilience: an affiliative neuroscience approach. *World Psychiatry*, 19(2), 132–150. <https://doi.org/10.1002/WPS.20729>
- Finn, E. S., Corlett, P. R., Chen, G., Bandettini, P. A., & Constable, R. T. (2018). Trait paranoia shapes inter-subject synchrony in brain activity during an ambiguous social narrative. *Nature Communications*, 9(1), 2043. <https://doi.org/10.1038/s41467-018-04387-2>
- 61 Biske, S. T., & Taylor, S. E. (2013). *Social cognition: From brains to culture*. Sage.
- Gilboa, A., & Marlatte, H. (2017). Neurobiology of Schemas and Schema-Mediated Memory. *Trends in Cognitive Sciences*, 21(8), 618–631. <https://doi.org/10.1016/j.tics.2017.04.013>

- Gong, W., Rolls, E. T., Du, J., Feng, J., & Cheng, W. (2021). Brain structure is linked to the association between family environment and behavioral problems in children in the ABCD study. *Nature Communications* 2021 12:1, 12(1), 1–10. <https://doi.org/10.1038/s41467-021-23994-0>
- 615 Halberstadt, A. G., Cassidy, J., Stifter, C. A., Parke, R. D., & Fox, N. A. (1995a). Self-Expressiveness Within the Family Context: Psychometric Support for a New Measure. *Psychological Assessment*, 7(1), 93–103. <https://doi.org/10.1037/1040-3590.7.1.93>
- Halberstadt, A. G., Cassidy, J., Stifter, C. A., Parke, R. D., & Fox, N. A. (1995b). Self-expressiveness  
620 within the family context: Psychometric support for a new measure. *Psychological Assessment*, 7(1), 93.
- Hasson, U., Nir, Y., Levy, I., Fuhrmann, G., & Malach, R. (2004a). Intersubject synchronization of cortical activity during natural vision. *Science*, 303(5664), 1634–1640. <https://doi.org/10.1126/science.1089506>
- 625 Hasson, U., Nir, Y., Levy, I., Fuhrmann, G., & Malach, R. (2004b). Intersubject synchronization of cortical activity during natural vision. *Science*, 303(5664), 1634–1640. <https://doi.org/10.1126/science.1089506>
- Hiser, J., & Koenigs, M. (2018). The Multifaceted Role of the Ventromedial Prefrontal Cortex in Emotion, Decision Making, Social Cognition, and Psychopathology. *Biological Psychiatry*, 83(8), 638–647. <https://doi.org/10.1016/j.biopsych.2017.10.030>
- 630 Hoyniak, C. P., Quinones-Camacho, L. E., Camacho, M. C., Chin, J. H., Williams, E. M., Wakschlag, L. S., & Perlman, S. B. (2021a). Adversity is Linked with Decreased Parent-Child Behavioral and Neural Synchrony. *Developmental Cognitive Neuroscience*, 48, 100937. <https://doi.org/10.1016/j.dcn.2021.100937>



63 Hoyniak, C. P., Quinones-Camacho, L. E., Camacho, M. C., Chin, J. H., Williams, E. M., Wakschlag,  
L. S., & Perlman, S. B. (2021b). Adversity is Linked with Decreased Parent-Child Behavioral  
and Neural Synchrony. *Dev Cogn Neurosci*, *48*, 100937.

<https://doi.org/10.1016/j.dcn.2021.100937>

Itahashi, T., Okada, N., Ando, S., Yamasaki, S., Koshiyama, D., Morita, K., Yahata, N., Koike, S.,  
640 Nishida, A., Kasai, K., & Hashimoto, R. ichiro. (2020). Functional connectomes linking child-  
parent relationships with psychological problems in adolescence. *NeuroImage*, *219*, 117013.

<https://doi.org/10.1016/j.neuroimage.2020.117013>

Justyna, W. (2017). Bio-Behavioral Synchrony Promotes the Development of Conceptualized  
Emotions. *Physiology & Behavior*, *176*(5), 139–148.

645 <https://doi.org/10.1016/j.physbeh.2017.03.040>

Krueger, F., Barbey, A. K., & Grafman, J. (2009a). The medial prefrontal cortex mediates social  
event knowledge. *Trends in Cognitive Sciences*, *13*(3), 103–109.

<https://doi.org/10.1016/j.tics.2008.12.005>

Krueger, F., Barbey, A. K., & Grafman, J. (2009b). The medial prefrontal cortex mediates social  
650 event knowledge. *Trends in Cognitive Sciences*, *13*(3), 103–109.

<https://doi.org/10.1016/j.tics.2008.12.005>

Kumar, M., Ellis, C. T., Lu, Q., Zhang, H., Capotă, M., Willke, T. L., Ramadge, P. J., Turk-Browne,  
N. B., & Norman, K. A. (2020). BrainIAK tutorials: User-friendly learning materials for  
advanced fMRI analysis. *PLoS Computational Biology*, *16*(1), e1007549.

655 <https://doi.org/10.1371/journal.pcbi.1007549>

- Lee, T. H., Miernicki, M. E., & Telzer, E. H. (2017). Families that fire together smile together: Resting state connectome similarity and daily emotional synchrony in parent-child dyads. *NeuroImage*, *152*, 31–37. <https://doi.org/10.1016/J.NEUROIMAGE.2017.02.078>
- Lee, T. H., Qu, Y., & Telzer, E. H. (2018). Dyadic Neural Similarity During Stress in Mother–Child  
660 Dyads. *Journal of Research on Adolescence*, *28*(1), 121–133.  
<https://doi.org/10.1111/JORA.12334>
- Lieberman, M. D., Straccia, M. A., Meyer, M. L., Du, M., & Tan, K. M. (2019). Social, self, (situational), and affective processes in medial prefrontal cortex (MPFC): Causal, multivariate, and reverse inference evidence. *Neuroscience and Biobehavioral Reviews*, *99*, 311–328.  
665 <https://doi.org/10.1016/j.neubiorev.2018.12.021>
- McCoy, D. C., & Raver, C. C. (2011). Caregiver Emotional Expressiveness, Child Emotion Regulation, and Child Behavior Problems among Head Start Families. *Social Development*, *20*(4), 741–761. <https://doi.org/10.1111/J.1467-9507.2011.00608.X>
- Morris, A. S., Cui, L., Criss, M. M., & Simmons, W. K. (2018). Emotion Regulation Dynamics  
670 During Parent–Child Interactions : Implications for Research and Practice. *Emotion Regulation*,  
70–90. <https://doi.org/10.4324/9781351001328-4>
- Nastase, S. A., Gazzola, V., Hasson, U., & Keysers, C. (2019). Measuring shared responses across subjects using intersubject correlation. *Social Cognitive and Affective Neuroscience*, *14*(6), 669–687. <https://doi.org/10.1093/scan/nsz037>
- 675 Nawa, N. E., & Ando, H. (2019). Effective connectivity within the ventromedial prefrontal cortex-hippocampus-amygdala network during the elaboration of emotional autobiographical memories. *NeuroImage*, *189*, 316–328. <https://doi.org/10.1016/j.neuroimage.2019.01.042>

- Nelemans, S. A., Keijsers, L., Colpin, H., van Leeuwen, K., Bijttebier, P., Verschueren, K., & Goossens, L. (2020). Transactional Links Between Social Anxiety Symptoms and Parenting  
680 Across Adolescence: Between- and Within-Person Associations. *Child Development, 91*(3), 814–828. <https://doi.org/10.1111/cdev.13236>
- Phillips, M. L., Robinson, H. A., & Pozzo-Miller, L. (2019). Ventral hippocampal projections to the medial prefrontal cortex regulate social memory. *ELife, 8*. <https://doi.org/10.7554/eLife.44182>
- Piazza, E. A., Hasenfratz, L., Hasson, U., & Lew-Williams, C. (2020). Infant and Adult Brains Are  
685 Coupled to the Dynamics of Natural Communication. *Psychological Science, 31*(1), 6–17. <https://doi.org/10.1177/0956797619878698>
- Quiñones-Camacho, L. E., Fishburn, F. A., Camacho, M. C., Hlutkowsky, C. O., Huppert, T. J., Wakschlag, L. S., & Perlman, S. B. (2020). Parent–child neural synchrony: a novel approach to elucidating dyadic correlates of preschool irritability. *Journal of Child Psychology and  
690 Psychiatry, 61*(11), 1213–1223. <https://doi.org/10.1111/JCPP.13165>
- Quiñones-Camacho, L. E., Hoyniak, C. P., Wakschlag, L. S., & Perlman, S. B. (2021). Getting in synch: Unpacking the role of parent-child synchrony in the development of internalizing and externalizing behaviors. *Development and Psychopathology, 1*–13. <https://doi.org/10.1017/S0954579421000468>
- 69 Raftery, A. E. (1995). Bayesian Model Selection in Social Research. *Sociological Methodology, 25*, 111. <https://doi.org/10.2307/271063>
- Ratliff, E. L., Kerr, K. L., Cosgrove, K. T., Simmons, W. K., & Morris, A. S. (2022). The Role of Neurobiological Bases of Dyadic Emotion Regulation in the Development of Psychopathology: Cross-Brain Associations Between Parents and Children. *Clinical Child and Family Psychology  
700 Review, 0123456789*. <https://doi.org/10.1007/s10567-022-00380-w>

- Reindl, V., Gerloff, C., Scharke, W., & Konrad, K. (2018a). Brain-to-brain synchrony in parent-child dyads and the relationship with emotion regulation revealed by fNIRS-based hyperscanning. *NeuroImage*, *178*, 493–502.
- Reindl, V., Gerloff, C., Scharke, W., & Konrad, K. (2018b). Brain-to-brain synchrony in parent-child  
705 dyads and the relationship with emotion regulation revealed by fNIRS-based hyperscanning. *NeuroImage*, *178*(November 2017), 493–502. <https://doi.org/10.1016/j.neuroimage.2018.05.060>
- Rothenberg, W. A., Lansford, J. E., Alampay, L. P., Al-Hassan, S. M., Bacchini, D., Bornstein, M. H., Chang, L., Deater-Deckard, K., Di Giunta, L., Dodge, K. A., Malone, P. S., Oburu, P., Pastorelli, C., Skinner, A. T., Sorbring, E., Steinberg, L., Tapanya, S., Tirado, L. M. U., &  
710 Yotanyamaneewong, S. (2020). Examining effects of mother and father warmth and control on child externalizing and internalizing problems from age 8 to 13 in nine countries. *Development and Psychopathology*, *32*(3), 1113–1137. <https://doi.org/10.1017/S0954579419001214>
- Roy, M., Shohamy, D., & Wager, T. D. (2012a). Ventromedial prefrontal-subcortical systems and the generation of affective meaning. *Trends in Cognitive Sciences*, *16*(3), 147–156.  
715 <https://doi.org/10.1016/j.tics.2012.01.005>
- Roy, M., Shohamy, D., & Wager, T. D. (2012b). Ventromedial prefrontal-subcortical systems and the generation of affective meaning. *Trends in Cognitive Sciences*, *16*(3), 147–156.  
<https://doi.org/10.1016/j.tics.2012.01.005>
- Schleider, J. L., & Weisz, J. R. (2017). Family process and youth internalizing problems: A triadic  
720 model of etiology and intervention. *Development and Psychopathology*, *29*(1), 273–301.  
<https://doi.org/10.1017/S095457941600016X>

- Simony, E., Honey, C. J., Chen, J., Lositsky, O., Yeshurun, Y., Wiesel, A., & Hasson, U. (2016). Dynamic reconfiguration of the default mode network during narrative comprehension. *Nature Communications*, 7, 12141. <https://doi.org/10.1038/ncomms12141>
- 72 Speidel, R., Wang, L., Cummings, E. M., & Valentino, K. (2020). Longitudinal pathways of family influence on child self-regulation: The roles of parenting, family expressiveness, and maternal sensitive guidance in the context of child maltreatment. *Developmental Psychology*, 56(3), 608–622. <https://doi.org/10.1037/DEV0000782>
- Tarullo, A. R., St. John, A. M., & Meyer, J. S. (2017). Chronic stress in the mother-infant dyad: 730 Maternal hair cortisol, infant salivary cortisol and interactional synchrony. *Infant Behavior and Development*, 47, 92–102. <https://doi.org/10.1016/j.infbeh.2017.03.007>
- Thomassin, K., & Suveg, C. (2014). Reciprocal Positive Affect and Well-Regulated, Adjusted Children: A Unique Contribution of Fathers. [Http://Dx.Doi.Org/10.1080/15295192.2014.880017](http://Dx.Doi.Org/10.1080/15295192.2014.880017), 14(1), 28–46. <https://doi.org/10.1080/15295192.2014.880017>
- 73 Valiente, C., Eisenberg, N., Spinrad, T. L., Reiser, M., Cumberland, A., Losoya, S. H., & Liew, J. (2006). Relations among mothers' expressivity, children's effortful control, and their problem behaviors: A four-year longitudinal study. *Emotion*, 6(3), 459–472. <https://doi.org/10.1037/1528-3542.6.3.459>
- Vanderwal, T., Eilbott, J., & Castellanos, F. X. (2019). Movies in the magnet: Naturalistic paradigms 740 in developmental functional neuroimaging. *Dev Cogn Neurosci*, 36, 100600. <https://doi.org/10.1016/j.dcn.2018.10.004>
- Wang, Q., Han, Z., Hu, X., Feng, S., Wang, H., Liu, T., & Yi, L. (2019). Autism Symptoms Modulate Interpersonal Neural Synchronization in Children with Autism Spectrum Disorder in

Cooperative Interactions. *Brain Topography* 2019 33:1, 33(1), 112–122.

745 <https://doi.org/10.1007/S10548-019-00731-X>

Wass, S. V., Whitehorn, M., Marriott, I., Phillips, E., & Leong, V. (2020). Interpersonal Neural Entrainment during Early Social Interaction. *Trends in Cognitive Sciences*, 24(4), 329–342.

<https://doi.org/10.1016/j.tics.2020.01.006>

750 Yarkoni, T., Poldrack, R. A., Nichols, T. E., Van Essen, D. C., & Wager, T. D. (2011). Large-scale automated synthesis of human functional neuroimaging data. *Nature Methods*, 8(8), 665–670.

<https://doi.org/10.1038/nmeth.1635>

Yeshurun, Y., Nguyen, M., & Hasson, U. (2021). The default mode network: where the idiosyncratic self meets the shared social world. *Nature Reviews Neuroscience*, 22(3), 181–192.

<https://doi.org/10.1038/s41583-020-00420-w>

755 Zeithamova, D., Dominick, A. L., & Preston, A. R. (2012). Hippocampal and ventral medial prefrontal activation during retrieval-mediated learning supports novel inference. *Neuron*, 75(1), 168–179. <https://doi.org/10.1016/j.neuron.2012.05.010>

760 **Figure 1**

*An Illustration of Experimental Design and Inter-Subject Correlation Analysis (ISC)*

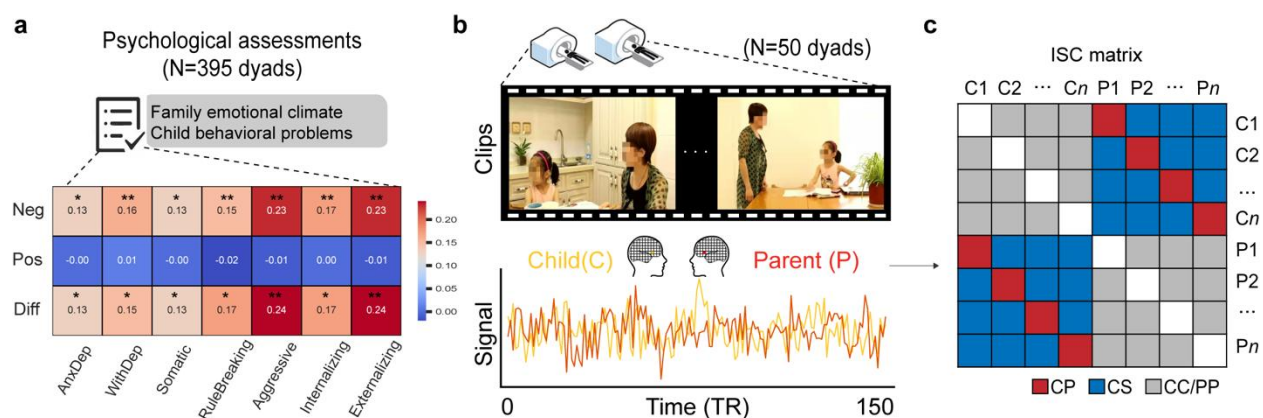

*Note.* a. Correlations of negative ('Neg') and positive ('Pos') family emotional climate with children's internalizing and externalizing problems respectively. The difference between the negative (top row) and positive (middle row) family emotional climate is shown with strong statistical evidence. b. Representative frames of a 6-min movie of a 7-year-old girl and her mother used as the fMRI paradigm. An illustration of voxel-wise ISC between two time series of a child-parent dyad for each voxel of the grey matter mask. c. A matrix represents pairwise correlations among child and parent subjects, resulting in child-parent dyads (CP, red), child-stranger controls (CS, blue), child-child & parent-parent pairs (CC/PP, grey). Each cell represents a ISC value. \*,  $q < 0.05$ ; \*\*,  $q < 0.01$ .

765

770

## Figure 2

775 *Primary Results from Inter-Subject Correlation (ISC) Analysis.*

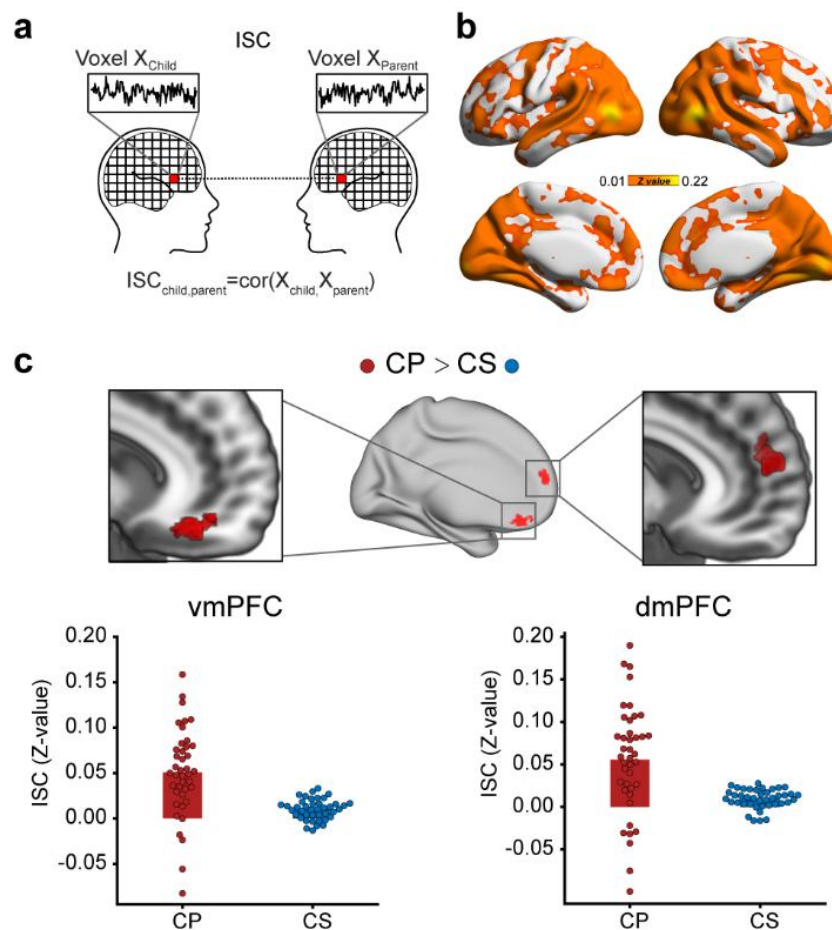

*Note.* a. An illustration of inter-subject correlation (ISC) between time series of a given voxel in each child and his/her parent's brain. b. Brain regions show statistically significant ISC during movie watching in general, with most prominent effect in the visual cortex followed by frontal, temporal, and parietal cortices. Statistically significant clusters were thresholded using  $q < 0.05$  FDR corrected. The color bar represents Fisher's Z-value. c. Representative views of the vmPFC and dmPFC showing stronger inter-subject synchronized activity (ISC) in child-parent dyads as compared to child-stranger controls. Statistically significant clusters were derived from a contrast

780



between child-parent (CP) dyads and child-stranger (CS) controls, with a voxel-wise threshold  $p$   
785  $< 0.001$  (two-tailed) combined with cluster-level threshold significance level  $\alpha$  of 0.05.

### Figure 3

Results from Inter-Subject Functional Connectivity (ISFC) Analysis.

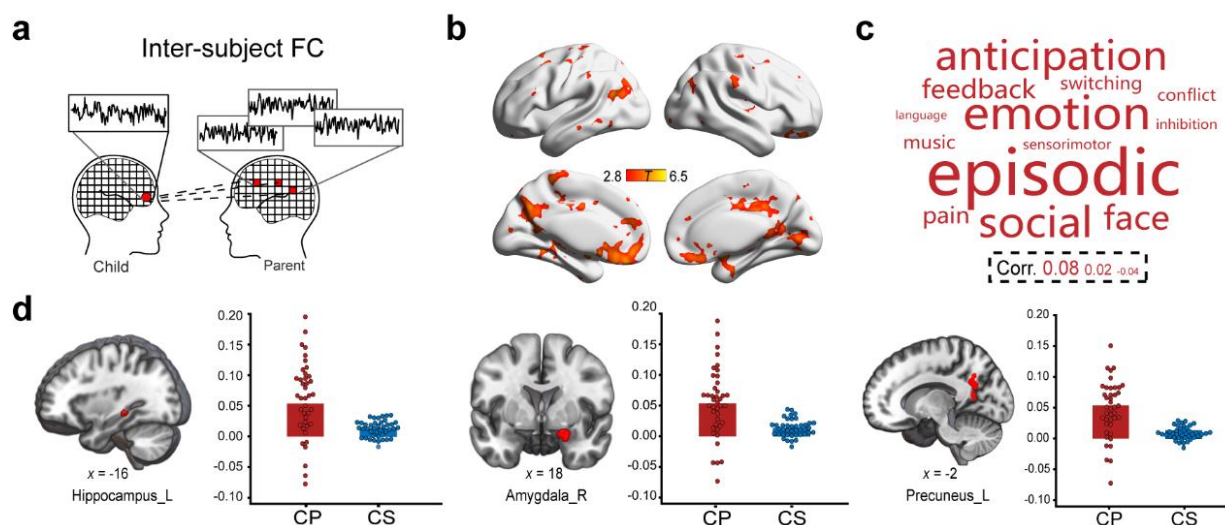

*Note.* a. An illustration of seed-based ISFC that involves computing the correlation between a seed's time series in a child brain and all other voxel's time series of his/her parent brain. b. Compared to child-stranger controls, child-parent dyads showed stronger ISFC of the vmPFC with inferior frontal gyrus, middle cingulum gyrus, precuneus, fusiform, hippocampus and middle occipital gyrus ( $df = 77$ ,  $q < 0.05$  FDR corrected). c. Word cloud depicting commonly used terminology associated with regions showing vmPFC connectivity. d. Representative slices of significant clusters in the hippocampus, amygdala and precuneus that show stronger ISFC in child-parent dyads than child-stranger control dyads.

## Figure 4

### *The Relationships between Negative Family Emotional Climate, ISFC and Internalizing Symptoms*

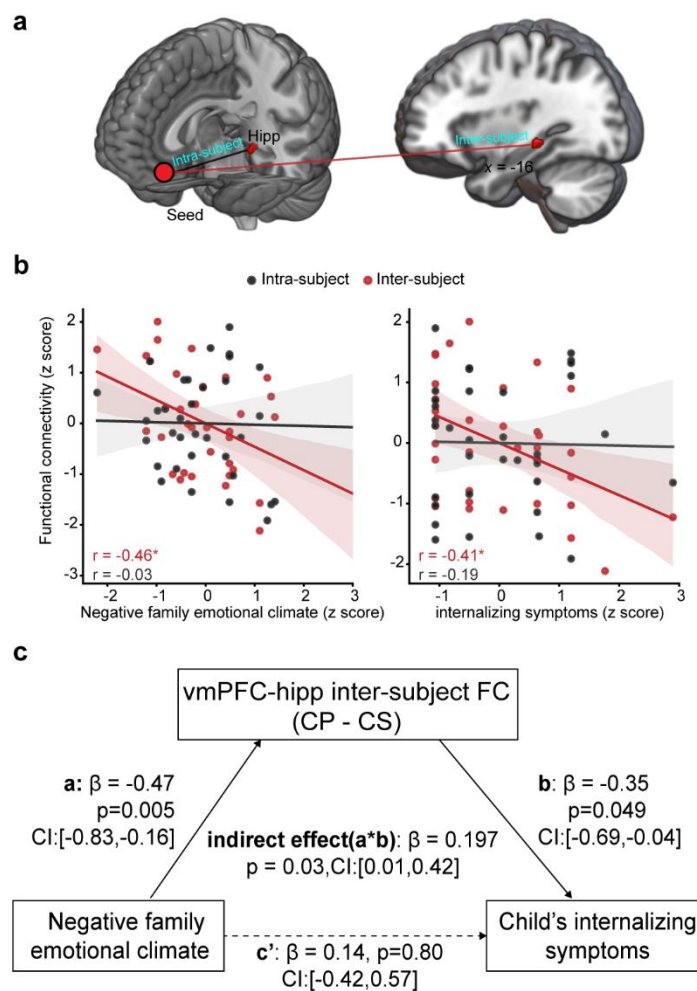

800

*Note.* a. Representative view of a vmPFC seed and its intra-subject and inter-subject connectivity with the hippocampus. b. Scatter plots depict the negative correlations (FDR corrected) of inter-subject vmPFC-hippocampal connectivity (red) with negative family emotional climate and children's anxious/depressed symptoms. This pattern is not observed using intra-subject vmPFC-hippocampal connectivity (gray). c. A mediation model depicts the indirect pathway of negative

805

family emotional climate on children's anxious/depressed symptoms via the shared vmPFC-hippocampal inter-subject connectivity. Standardized coefficients are depicted. The solid lines represent statistically significant effect. Notes:  $*q < 0.05$ . All statistical tests here are two-tailed and pass the FDR correction.

## Figure 5

### Child-Parent Hippocampal and VmPfc Activity Concordance during Movie Watching

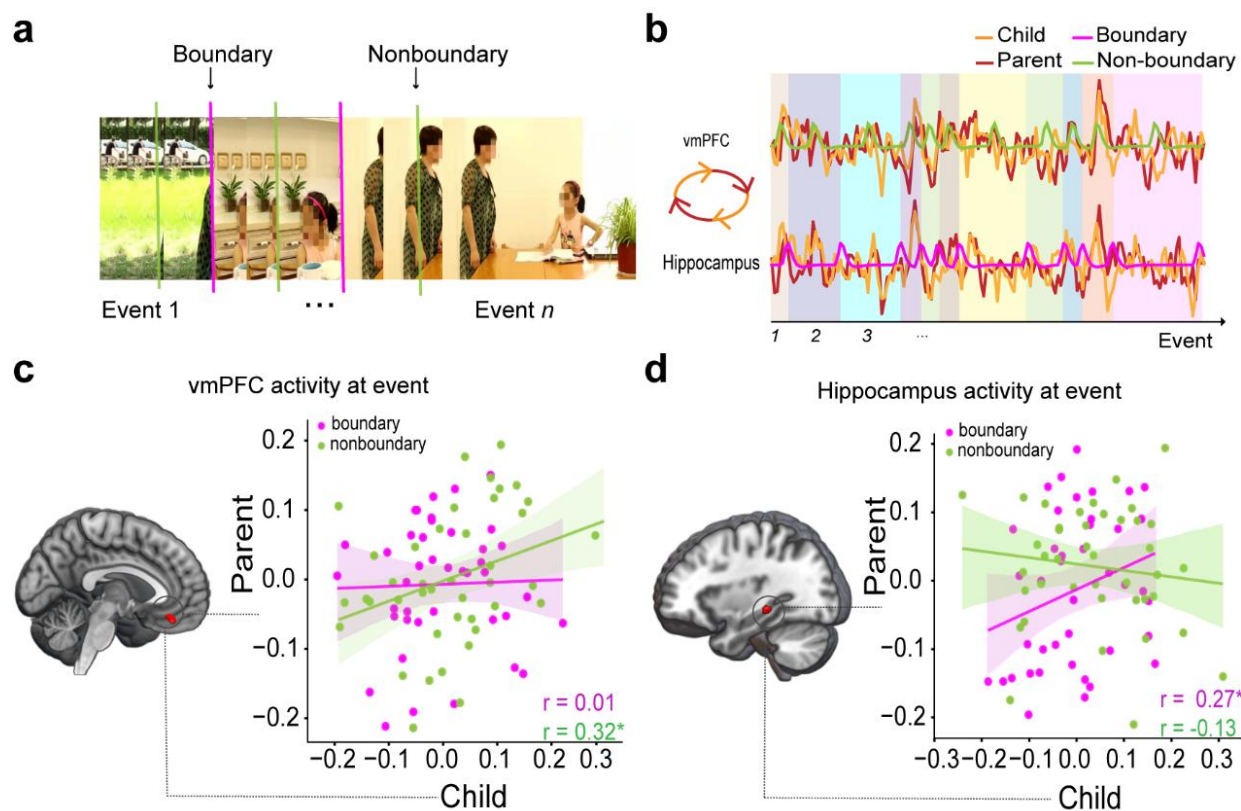

*Note.* a. An illustration of boundary and non-boundary events for major episodic events during  
815 movie watching. b. Child-parent dyads showed higher vmPFC-hippocampus functional coupling  
during movie watching, and their vmPFC and hippocampal activity concordance were modulated  
by segmentation of event boundaries. The magenta and green lines represent expected signals of  
event boundaries and non-boundaries respectively. The yellow and red lines represent neural  
signals in children and parents separately. c. Child-parent hippocampal activity concordance was  
820 significantly higher for boundary than non-boundary event time series ( $Z = 1.84, p = 0.03$ ). d.  
Child-parent vmPFC activity concordance was marginally significant higher for boundary than  
non-boundary timeseries ( $Z = -1.39, p = 0.08$ ).
